# Supplementary material
Source: publisher site journal article supplement (https://www.dovepress.com/get_supplementary_file.php?f=427818.docx)
Supplement: Supplementary file 1 [file get_supplementary_file.php]

**Appendix 1: Representative chromatograms**

**Curcumin**

1. Blank

1. CC-1

1. ULOQ

1. HQC

1. MQC

1. LQC

1. Representative sample

**Demethoxy Curcumin**

1. Blank

1. CC-1

1. ULOQ

1. HQC

1. MQC

1. LQC

1. Representative sample

**Bis-demethoxy Curcumin**

1. Blank

1. CC-1

1. ULOQ

1. HQC

1. MQC

1. LQC

1. Representative sample

**Appendix 2: Transwell Plate Map for Permeability assay**


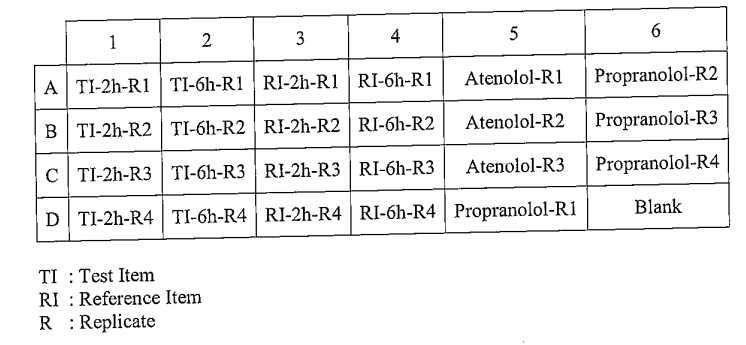


**Supplementary Table 1:** Chromatography parameters used for LC-MS/MS assay of the samples collected from the permeability assay/experiment at different time points

| **Parameter** | **Value** |
| --- | --- |
| Polarity | Negative ion mode |
| Column oven temperature | 40°C |
| Peltier temperature | 10°C |
| Mobile phase | 0.2% formic acid in water:acetonitrile (30:70) |
| **Detection ions** |  |
| Curcumin | 367.500 amu (parent), 134.000 amu (product) |
| Curcumin-D6 | 373.300 amu (parent), 152.000 amu (product) |
| Demethoxycurcumin | 338.100 amu (parent), 119.100 amu (product) |
| Bisdemethoxycurcumin | 308.100 amu (parent), 119.100 amu (product) |
| **Retention time** |  |
| Curcumin | 1.84 ± 0.5 min |
| Curcumin-D6 | 1.82 ± 0.5 min |
| Demethoxycurcumin | 1.71 ± 0.5 min |
| Bisdemethoxycurcumin | 1.59 ± 0.5 min |
| **Run time** | 3 min |

**Supplementary Table 2:** Spectrometric parameters used for LC-MS/MS assay of the samples collected from the permeability assay/experiment at different time points

| Ion spray voltage | −4500 V |
| --- | --- |
| Curtain gas | Psis |
| CAD gas | Psis |
| Temperature | 550°C |
| Gas 1 | Psis |
| Gas 2 | Psis |
| Entrance potential | −10.00 |
| **Declustering potential** |  |
| Curcumin | −50 |
| Curcumin-D6 | −60 |
| Demethoxycurcumin | −60 |
| Bisdemethoxycurcumin | −60 |
| **Collision potential** |  |
| Curcumin | −45 |
| Curcumin-D6 | −26 |
| Demethoxycurcumin | −41 |
| Bisdemethoxycurcumin | −38 |
| **Collision cell exit potential** |  |
| Curcumin | −24 |
| Curcumin-D6 | −10 |
| Demethoxycurcumin | −8 |
| Bisdemethoxycurcumin | −9 |
